# Supplementary material for: Changes in multiple cytokine concentrations in the aqueous humour of neovascular age-related macular degeneration after 2 months of ranibizumab therapy
Source: PubMed Central journal article supplement — Br J Ophthalmol. 2017 Aug 1;102(4):448–54. doi: 10.1136/bjophthalmol-2017-310284 (PMC5890644; doi:10.1136/bjophthalmol-2017-310284), 2017-08-01
Supplement: bjophthalmol-2017-310284supp001.pdf [file bjophthalmol-2017-310284supp001.pdf]

**Supplementary Table 1** Correlation between the concentration of VEGF and that of other cytokines before anti-VEGF therapy

|        | <i>R</i> | <i>P</i> value |
|--------|----------|----------------|
| CXCL1  | 0.37     | 0.08           |
| IP-10  | 0.11     | 0.62           |
| CXCL12 | -0.091   | 0.68           |
| CXCL13 | -0.13    | 0.55           |
| MCP-1  | 0.17     | 0.44           |
| CCL11  | 0.16     | 0.47           |
| IL-6   | 0.20     | 0.35           |
| IL-10  | 0.36     | 0.09           |
| MMP-9  | 0.38     | 0.076          |

R, correlation coefficient

CXCL1, C-X-C motif chemokine ligand 1; IP-10, interferon- $\gamma$ -induced protein 10;

CXCL12, C-X-C motif chemokine ligand 12; CXCL13, C-X-C motif chemokine

ligand 13; MCP-1, monocyte chemoattractant protein 1; CCL11, C-C motif

chemokine ligand 11; IL-6, interleukin-6; IL-10, interleukin-10; MMP-9, matrix

metalloproteinase 9.
